# Supplementary material for: Use of eHealth in the management of pulmonary arterial hypertension: review of the literature
Source: PubMed Central journal article supplement — BMJ Health Care Inform. 2020 Sep 13;27(3):e100176. doi: 10.1136/bmjhci-2020-100176 (PMC7490940; doi:10.1136/bmjhci-2020-100176), 2020-09-13
Supplement: bmjhci-2020-100176supp001.pdf [file bmjhci-2020-100176supp001.pdf]

## Appendix 1. PubMed search strategy for eHealth interventions on Pulmonary Arterial Hypertension:

| Step | Concept                | Search query                                                                                                                                                                                                                                                                                                                                                                                                                                                                                                                                                                                                                                                                                                                                                                                                                                                                                                                                                                                                                                                                                                                                                                                                                                                                                                                                                                                                                                                                                                                        | Search hits |
|------|------------------------|-------------------------------------------------------------------------------------------------------------------------------------------------------------------------------------------------------------------------------------------------------------------------------------------------------------------------------------------------------------------------------------------------------------------------------------------------------------------------------------------------------------------------------------------------------------------------------------------------------------------------------------------------------------------------------------------------------------------------------------------------------------------------------------------------------------------------------------------------------------------------------------------------------------------------------------------------------------------------------------------------------------------------------------------------------------------------------------------------------------------------------------------------------------------------------------------------------------------------------------------------------------------------------------------------------------------------------------------------------------------------------------------------------------------------------------------------------------------------------------------------------------------------------------|-------------|
| 1    | Pulmonary Hypertension | "Hypertension, Pulmonary"[Mesh] OR "Pulmonary Hypertension" OR "Pulmonary arterial Hypertension" OR "Idiopathic Pulmonary Hypertension" OR "Primary Pulmonary Hypertension" OR "Secondary Pulmonary Hypertension" OR "Associated Pulmonary Hypertension" OR "pulmonary arterial pressure"                                                                                                                                                                                                                                                                                                                                                                                                                                                                                                                                                                                                                                                                                                                                                                                                                                                                                                                                                                                                                                                                                                                                                                                                                                           | 48,818      |
| 2    | eHealth                | "Telecommunications"[Mesh] OR "Remote Monitoring" OR telemonitoring OR tracking OR Wireless OR "step counter" OR pedometer<br>OR<br>"Mobile Applications"[Mesh] OR "Computers, Handheld"[Mesh] OR "Smartphone"[Mesh] OR "Text Messaging"[Mesh]<br>OR<br>"cellphone" OR "cellphones" OR "cell phone" OR "cell phones" OR "cellular phone" OR "cellular phones" OR "mobile phone" OR "mobile phones" OR "mobile device" OR "mobile devices" OR "mobile-based" OR "mobile-based application" OR "mobile telephone" OR "mobile telephones" OR "smartphone" OR "smartphones" OR "smart phone" OR "smart phones" OR "iPhone" OR "android" OR "mhealth" OR "m-health" OR "mobile health" OR "Mobile Applications" OR "Cellular Phone" OR "mobile app" OR "mobile apps" OR "mobile health app" OR "mobile health apps" OR "mobile phone app" OR "mobile phone apps" OR "mobile technology" OR "mobile technologies" OR "mobile telecommunication" OR "mobile telecommunications" OR "text messaging"<br>OR<br>"Telemedicine" [Mesh] OR Telemedicine OR "telehealth" OR eHealth OR "electronic health" OR "mobile telehealth" OR "mobile telemedicine" OR "tele-health" OR "mobile health monitoring" OR "Remote health monitoring" OR "telemedicine" OR "tele-medicine" OR "portable software application" OR "handheld computer" OR "palmtop computer" OR "palm-top computer" OR "Personal Digital Assistant" OR "PDA computer" OR "Pocket PC" OR "Pocket PCs" OR "Tablet Computer" OR "Tablet Computers" OR "Palm Pilot" OR "Palm pilots" | 178,926     |
| 3    | 1 AND 2                |                                                                                                                                                                                                                                                                                                                                                                                                                                                                                                                                                                                                                                                                                                                                                                                                                                                                                                                                                                                                                                                                                                                                                                                                                                                                                                                                                                                                                                                                                                                                     | 233         |
